# Supplementary material for: Paternal methotrexate exposure affects sperm small RNA content and causes craniofacial defects in the offspring
Source: PubMed Central journal article supplement (PMC10036556; doi:10.1038/s41467-023-37427-7), 2023-03-23
Supplement: 41467_2023_37427_MOESM1_ESM.pdf [file 41467_2023_37427_MOESM1_ESM.pdf]

## Supplementary Figures

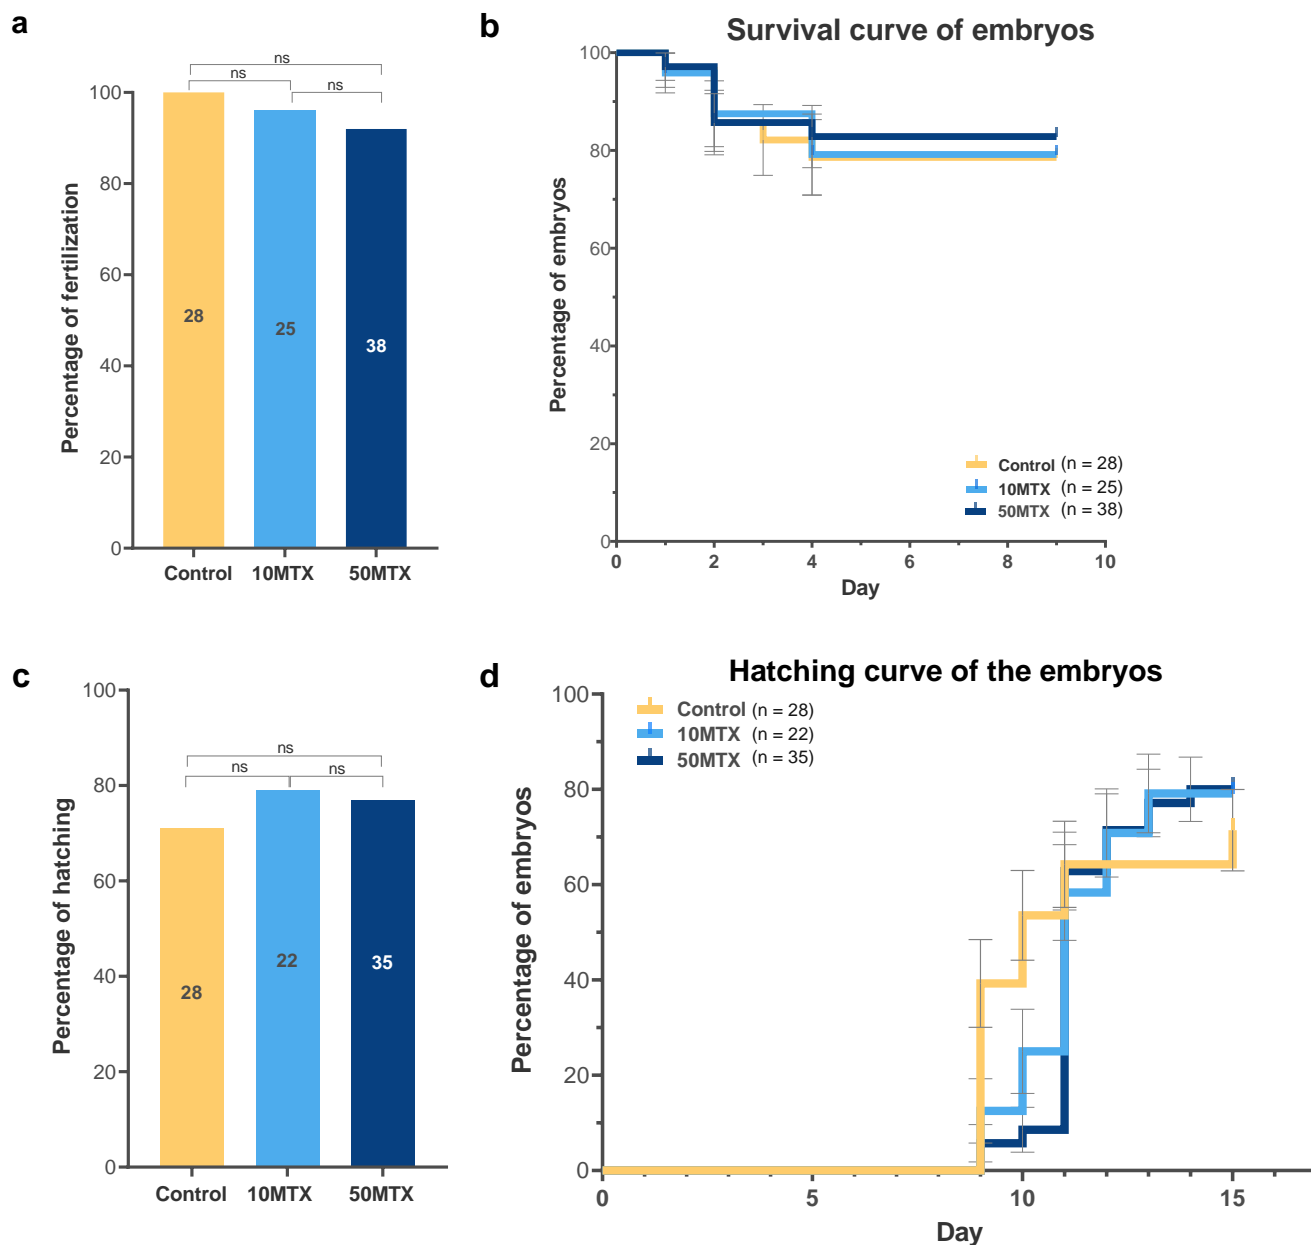

**Figure S1: (a)** Histogram showing the percentage of fertilization utilizing the sperm from control and MTX treated males. **(b)** Kaplan Meier plot displaying the survival of fertilized eggs until the beginning of hatch. Histogram showing the percentage of hatching embryos **(c)** and the day of hatching **(d)** on control and MTX group. Values are means  $\pm$  SEM. Numbers in the graph represent the analyzed embryos. Statistics for A and C were generated by contingency table followed by Chi-square test. Statistics for B and D were generated by using the Long-rank (Matel-Cox) test, Gehan-Breslow-Wilcoxon test. ns:  $P > 0.05$ .

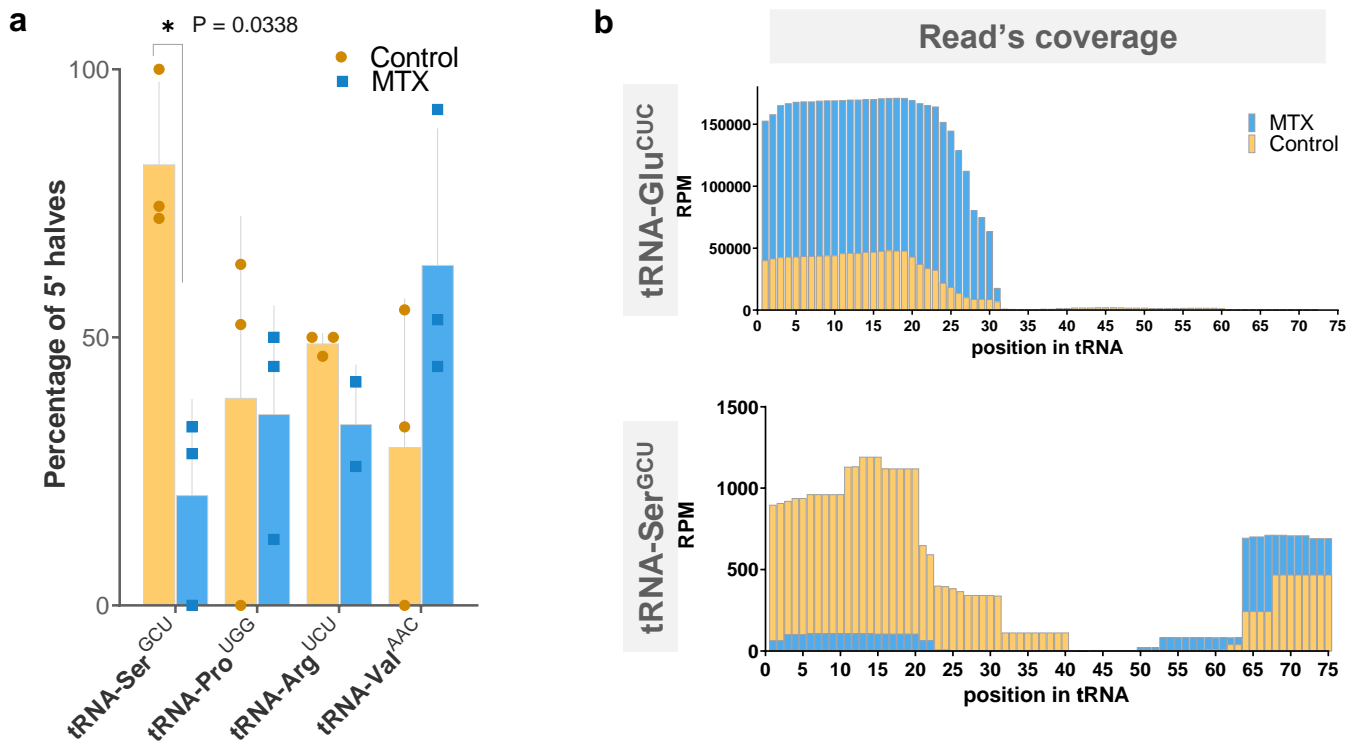

**Figure S2: (a)** Histogram displaying percentage of 5' halves relative to their corresponding 3' halves from tRNAs not affected (tRNA-Pro<sup>UGG</sup>, -Arg<sup>UCU</sup>, -Val<sup>AAC</sup>) or having a reduction (tRNA-Ser<sup>GCU</sup>) on MTX treatment. Data represent three biologically independent replicates (n = 3) composed by RNA isolated from 9 males' sperm. Asterisk indicated significant differences analyzed by multiple unpaired t-student' test followed by a correction for multiple comparison (Holm-Sidak method, with alpha = 0.05). Values are means  $\pm$  SD. **(b)** Histogram showing the read coverage for tRNA-Glu<sup>CUC</sup> and -Ser<sup>GCU</sup>. See also **Supplementary Data 5**.

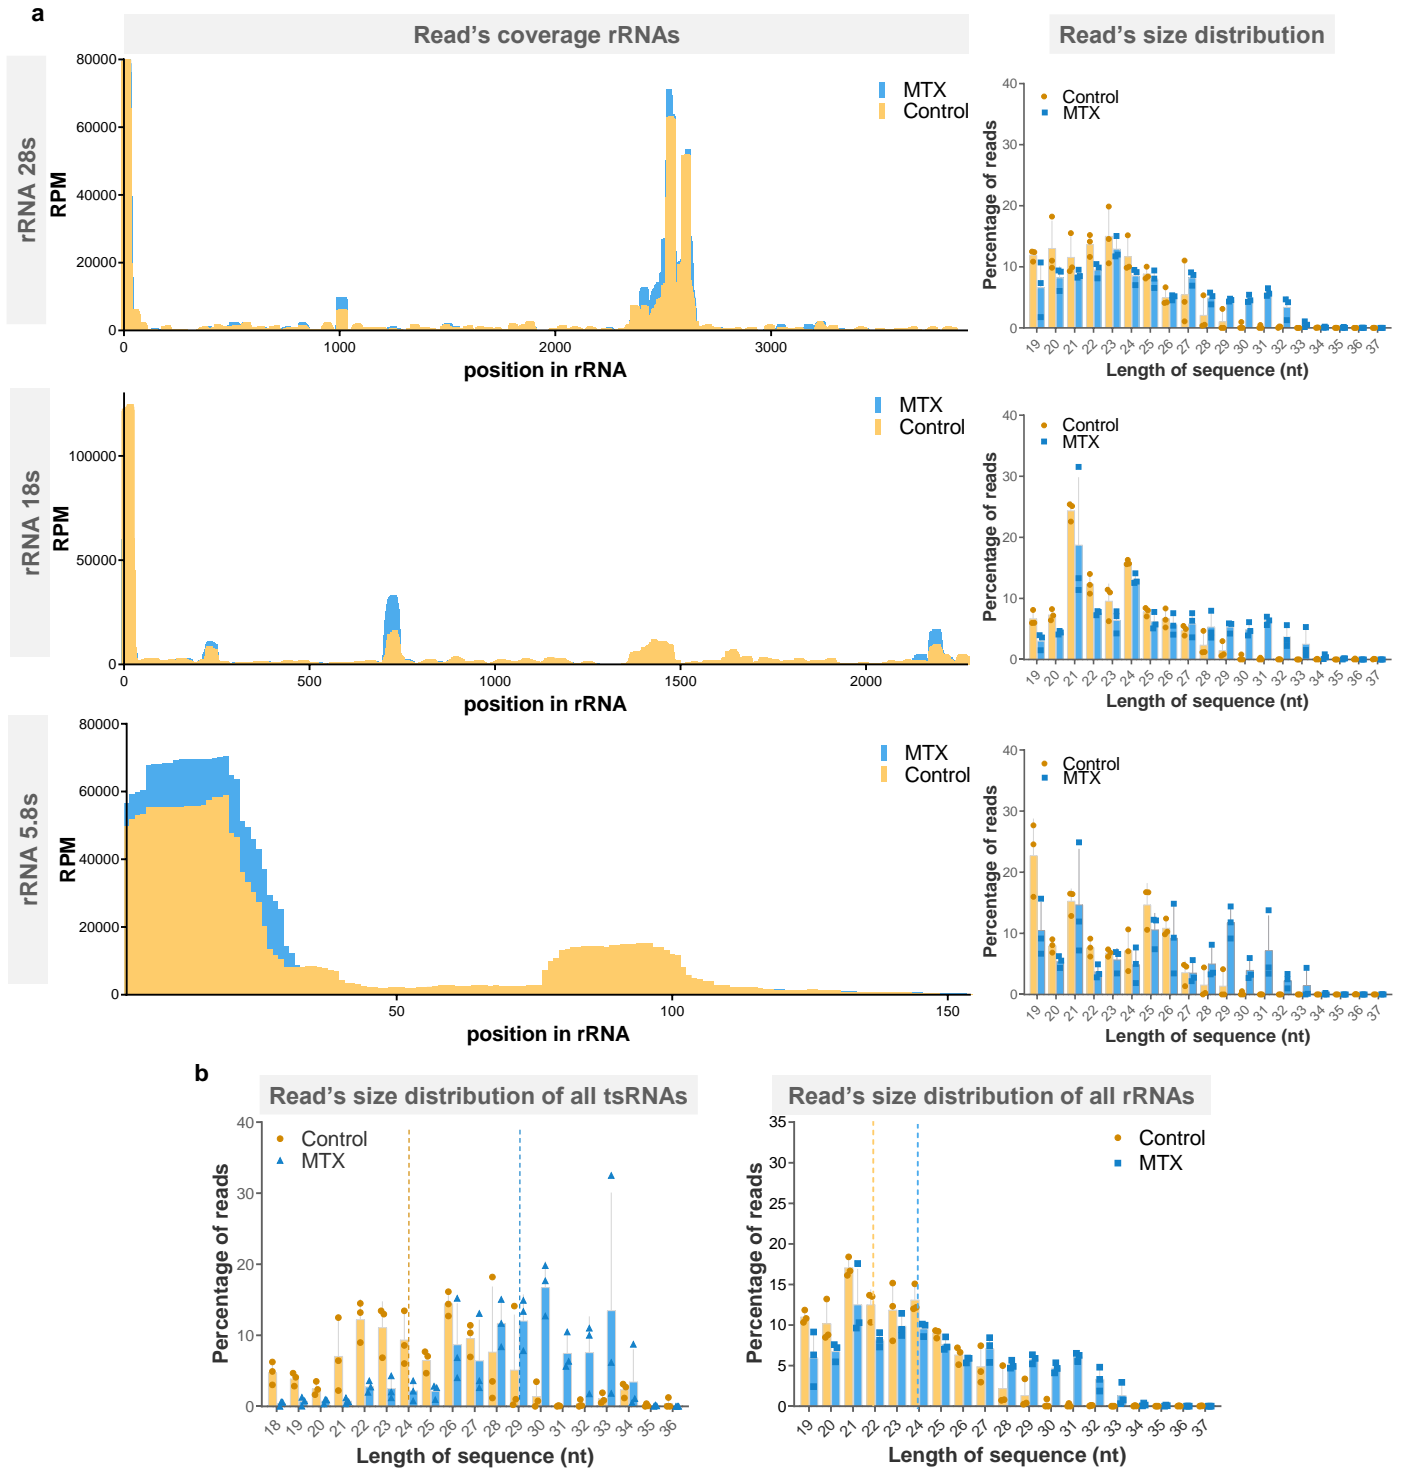

**Figure S3: (a)** Histogram showing the read coverage and size distribution for the most abundant rRNAs (28s, 18s and 5.8s) between control and MTX. **(b)** Histograms showing the size distribution for all mapped tsRNA and rRNA on control and MTX treated males. Dotted lines represent the median length. Values on read's size distribution are means  $\pm$  SD. See also **Supplementary Data**

5.

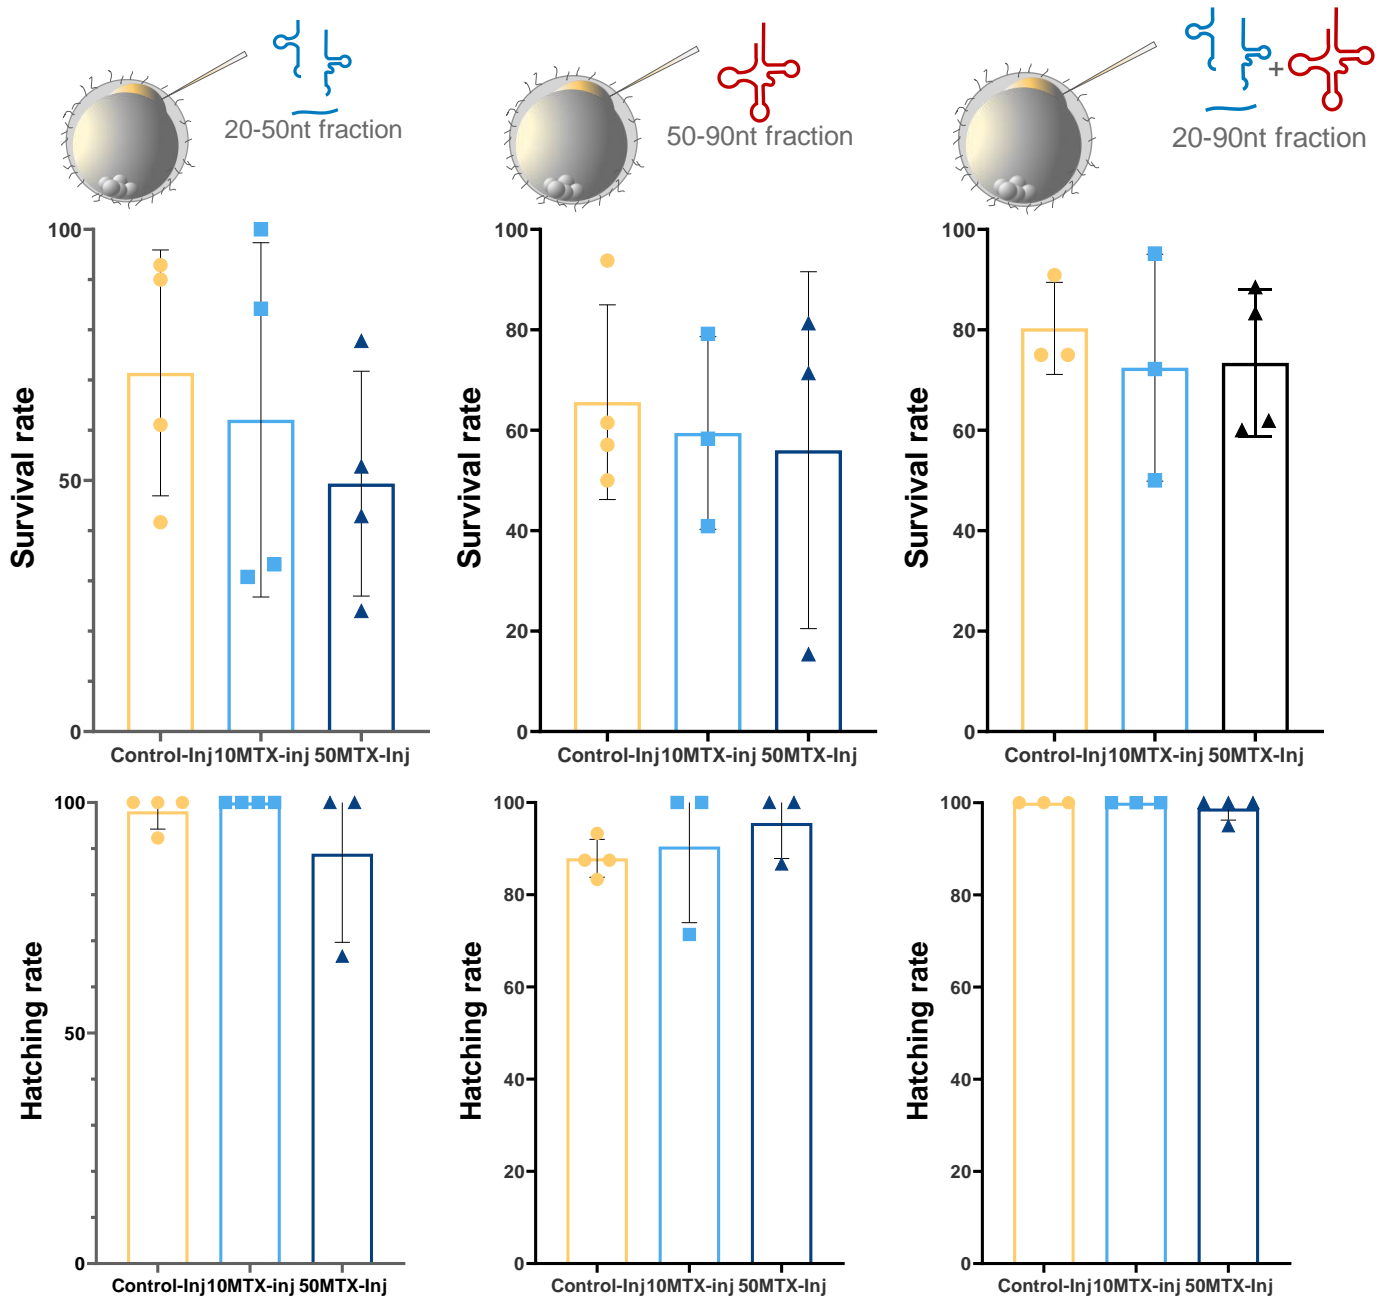

**Figure S4:** Histogram showing the percentage of survival and hatching of different batches of fertilized wild-type eggs injected with sperm RNA fractions obtained from control, 10MTX and 50MTX treated males. ). Each dot represents a biological experimental replicate composed by a pool of embryos. Number of embryos utilized: 20-50nt RNA Control-Inj (n= 14, 24, 18, and 20); 10MTX-Inj (n= 26, 18, 20, and 38); and 50MTX-Inj (n= 9, 14, 25, and 36). 50-90nt RNA Control-Inj (n= 16, 13, 12, 14, and 12); 10MTX-inj (n= 24, 22, 12, and 22); and 50MTX-Inj (n= 16, 21, and 39). 20-90nt RNA Control-Inj (n= 11, 20, and 28); 10MTX-Inj (n= 21, 18, and 16); and 50MTX-Inj (n= 24, 26, 15, and 21).

Hatching rate; for 20-50nt RNA Injections: Control-Inj: n=13, 10, 11, 18; 10MTX-Inj: n= 8, 6, 20, 32: and 50MTX-Inj: n=7, 6, 6 viable embryos at the hatching start point. For 50-90 nt RNA Inj: Control-Inj: n= 15, 8, 6, 8, 11; 10MTX-Inj: n= 19, 9, 7, 18; 50MTX-Inj: n= 13, 15, 6 viable embryos at the hatching start point. For 20-90nt RNA injection: Control-Inj: n= 10, 15, 21; 10MTX-Inj: n= 20, 13, 8; 50MTX-Inj: n= 20, 23, 9, 13 viable embryos at the hatching start point. Statistics by one-way ANOVA followed by Turkey's multiple comparisons test. Non-significant differences were observed in all cases ( $P > 0.05$ ). Values are means  $\pm$  SE.

## Supplementary Tables

| Gene symbol           | Accession Number     | Primer sequence (5'-3')                                                 |
|-----------------------|----------------------|-------------------------------------------------------------------------|
| <i>Trmt6</i>          | ENSORLG00000009862.2 | <b>Fw:</b> CGGGAACAGACAACAGGAATA<br><b>Rv:</b> GACCCTTCAGACCTTGATCTTT   |
| <i>Dnmt2 (Trdmt1)</i> | ENSORLG00000019403.2 | <b>Fw:</b> AGGCCACCTCGCTTTATTC<br><b>Rv:</b> CTTGTGGGAGAGGCCATAATC      |
| <i>Nsun2</i>          | ENSORLG00000014332.3 | <b>Fw:</b> AGATGCTTCACGCTGACATG<br><b>Rv:</b> TTGTTGCCACGTCATTGGC       |
| <i>RPL7</i>           | ENSORLG00000007967.2 | <b>Fw:</b> CGCCAGATCTCAACGGTGTAT<br><b>Rv:</b> AGGCTCAGCAATCCTCAGCAT    |
| <i>ef1a</i>           | ENSORLG00000007614   | <b>Fw:</b> GGAGGCCAGCGACAAGATGAGC.<br><b>Rv:</b> ACACGGCCGACAGGGACAGTTC |

**Supplementary table 1:** Primer sequences utilized for RT-qPCR

| Sample    | Species           | 3' Adapter used | 3' Adapter barcode | 3' barcoded adapter                                                     | 5' Adapter                                              | small-RNaseq RT primer               | Solexa_PCR_fwd                                                                            | Solexa_IDX_rev                                                                                            |
|-----------|-------------------|-----------------|--------------------|-------------------------------------------------------------------------|---------------------------------------------------------|--------------------------------------|-------------------------------------------------------------------------------------------|-----------------------------------------------------------------------------------------------------------|
| Control-1 | <i>O. latipes</i> | SRBC1           | CAGTG              | 5'-<br>/SrApp/NNNNNN <b>CAG</b><br>TGAGATCGGAAGAGCA<br>CACGTCT/3ddC/-3' | 5'-<br>ACACUCUUUCCCUAC<br>ACGACGCUCUUCCG<br>AUCUNNNN-3' | 5'-<br>AGACGTGTGCTC<br>TTCCGATCT -3' | 5'-<br>AATGATACGGCGACCA<br>CCGAGATCT <b>ACACTCTT</b><br>TCCCTACACGACGCTCT<br>TCCGATCT -3' | 5'-<br>CAAGCAGAAGA<br>CGGCATACGAG<br>AT <b>CAGTG</b> GTGAC<br>TGGAGTTCAGAC<br>GTGTGCTCTTCC<br>GATCT - 3'  |
| Control-2 | <i>O. latipes</i> | SRBC2           | AGCAA              | 5'-<br>/SrApp/NNNNNN <b>AGC</b><br>AAAGATCGGAAGAGCA<br>CACGTCT/3ddC/-3' | 5'-<br>ACACUCUUUCCCUAC<br>ACGACGCUCUUCCG<br>AUCUNNNN-3' | 5'-<br>AGACGTGTGCTC<br>TTCCGATCT -3' | 5'-<br>AATGATACGGCGACCA<br>CCGAGATCT <b>ACACTCTT</b><br>TCCCTACACGACGCTCT<br>TCCGATCT -3' | 5'-<br>CAAGCAGAAGA<br>CGGCATACGAG<br>AT <b>AGCAA</b> GTGA<br>CTGGAGTTCAGA<br>CGTGTGCTCTTC<br>CGATCT - 3'  |
| Control-3 | <i>O. latipes</i> | SRBC3           | GGTAT              | 5'-<br>/SrApp/NNNNNN <b>GGT</b><br>ATAGATCGGAAGAGCA<br>CACGTCT/3ddC/-3' | 5'-<br>ACACUCUUUCCCUAC<br>ACGACGCUCUUCCG<br>AUCUNNNN-3' | 5'-<br>AGACGTGTGCTC<br>TTCCGATCT -3' | 5'-<br>AATGATACGGCGACCA<br>CCGAGATCT <b>ACACTCTT</b><br>TCCCTACACGACGCTCT<br>TCCGATCT -3' | 5'-<br>CAAGCAGAAGA<br>CGGCATACGAG<br>AT <b>GGTAT</b> GTGAC<br>TGGAGTTCAGAC<br>GTGTGCTCTTCC<br>GATCT - 3'  |
| 10MTX-1   | <i>O. latipes</i> | SRBC4           | TACCA              | 5'-<br>/SrApp/NNNNNN <b>TACC</b><br>AAGATCGGAAGAGCAC<br>ACGTCT/3ddC/-3' | 5'-<br>ACACUCUUUCCCUAC<br>ACGACGCUCUUCCG<br>AUCUNNNN-3' | 5'-<br>AGACGTGTGCTC<br>TTCCGATCT -3' | 5'-<br>AATGATACGGCGACCA<br>CCGAGATCT <b>ACACTCTT</b><br>TCCCTACACGACGCTCT<br>TCCGATCT -3' | 5'-<br>CAAGCAGAAGA<br>CGGCATACGAG<br>ATT <b>TACCA</b> GTGAC<br>TGGAGTTCAGAC<br>GTGTGCTCTTCC<br>GATCT - 3' |
| 10MTX-2   | <i>O. latipes</i> | SRBC5           | GTCAG              | 5'-<br>/SrApp/NNNNNN <b>GTC</b><br>AGAGATCGGAAGAGC<br>ACACGTCT/3ddC/-3' | 5'-<br>ACACUCUUUCCCUAC<br>ACGACGCUCUUCCG<br>AUCUNNNN-3' | 5'-<br>AGACGTGTGCTC<br>TTCCGATCT -3' | 5'-<br>AATGATACGGCGACCA<br>CCGAGATCT <b>ACACTCTT</b><br>TCCCTACACGACGCTCT<br>TCCGATCT -3' | 5'-<br>CAAGCAGAAGA<br>CGGCATACGAG<br>AT <b>GTCAG</b> GTGAC<br>TGGAGTTCAGAC<br>GTGTGCTCTTCC<br>GATCT - 3'  |
| 10MTX-3   | <i>O. latipes</i> | SRBC6           | TGACT              | 5'-<br>/SrApp/NNNNNN <b>TGA</b><br>CTAGATCGGAAGAGCA<br>CACGTCT/3ddC/-3' | 5'-<br>ACACUCUUUCCCUAC<br>ACGACGCUCUUCCG<br>AUCUNNNN-3' | 5'-<br>AGACGTGTGCTC<br>TTCCGATCT -3' | 5'-<br>AATGATACGGCGACCA<br>CCGAGATCT <b>ACACTCTT</b><br>TCCCTACACGACGCTCT<br>TCCGATCT -3' | 5'-<br>CAAGCAGAAGA<br>CGGCATACGAG<br>ATT <b>TGACT</b> GTGAC<br>TGGAGTTCAGAC<br>GTGTGCTCTTCC<br>GATCT - 3' |

**Supplementary Table 2:** Adapter oligos utilized for library preparation.
